# Supplementary material for: Formation of a narrow chiral cavity in bis-copper(ii) complexes of ferrocenylmethyl-l-tyrosine and its interaction with achiral guests
Source: Royal Society of Chemistry journal article supplement (doi:10.1039/b819915a), 2009-01-01
Supplement: b819915a.pdf [file b819915a.pdf]

## Supplementary Information

### Formation of a narrow chiral cavity in bis-copper(II) complexes of ferrocenyl-methyl-L-tyrosine and its interaction with achiral guests

Subash Chandra Sahoo and Manabendra Ray\*

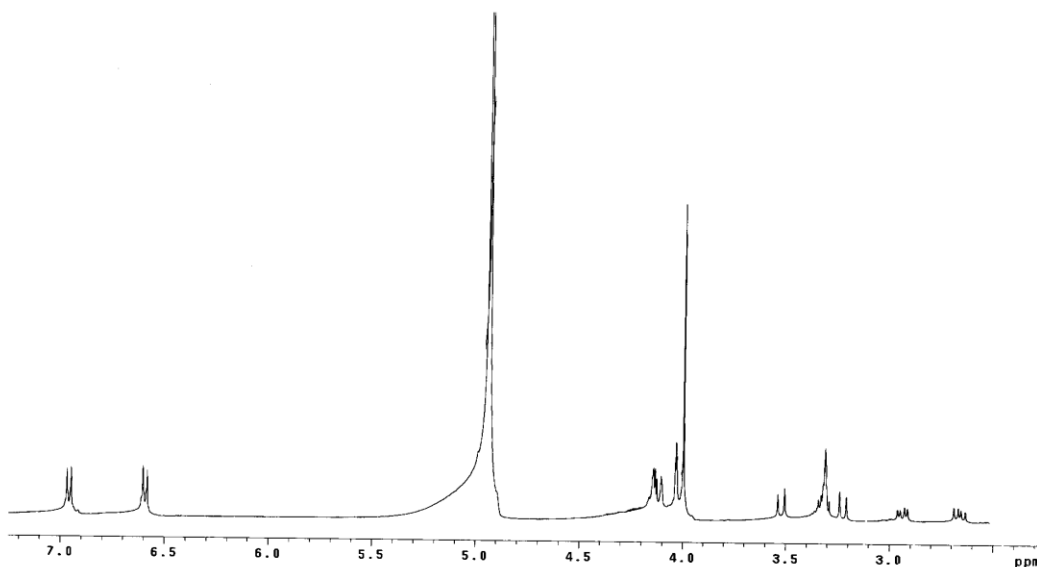

**Figure S1.** <sup>1</sup>H NMR spectrum of the ligand H(*S*-fTYR) in CD<sub>3</sub>OD with 1 eq. of LiOH.

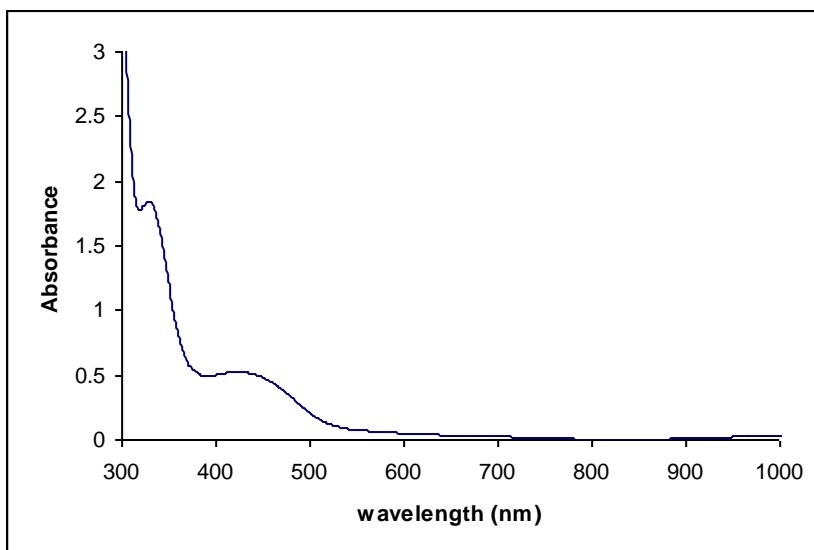

**Figure S2.** The UV-vis spectra of ligand H(S-fTyr) in MeOH with 1 eq. LiOH

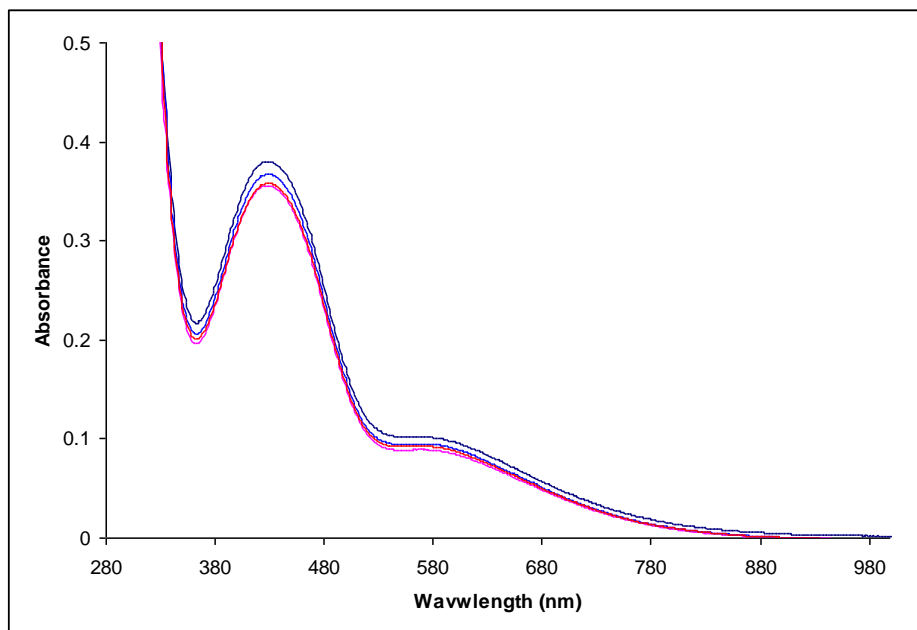

**Figure S3.** The UV-vis spectra complexes (1-5) in MeOH .

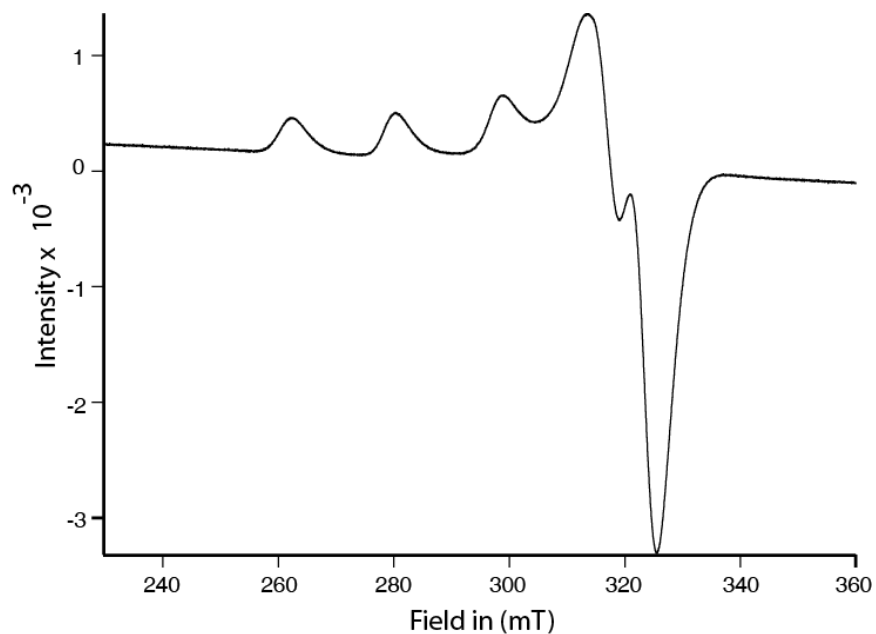

**Figure S4.** EPR of complex **1** [Cu(S-fTyr)<sub>2</sub>(MeCN)<sub>2</sub>] in MeOH at 77k.

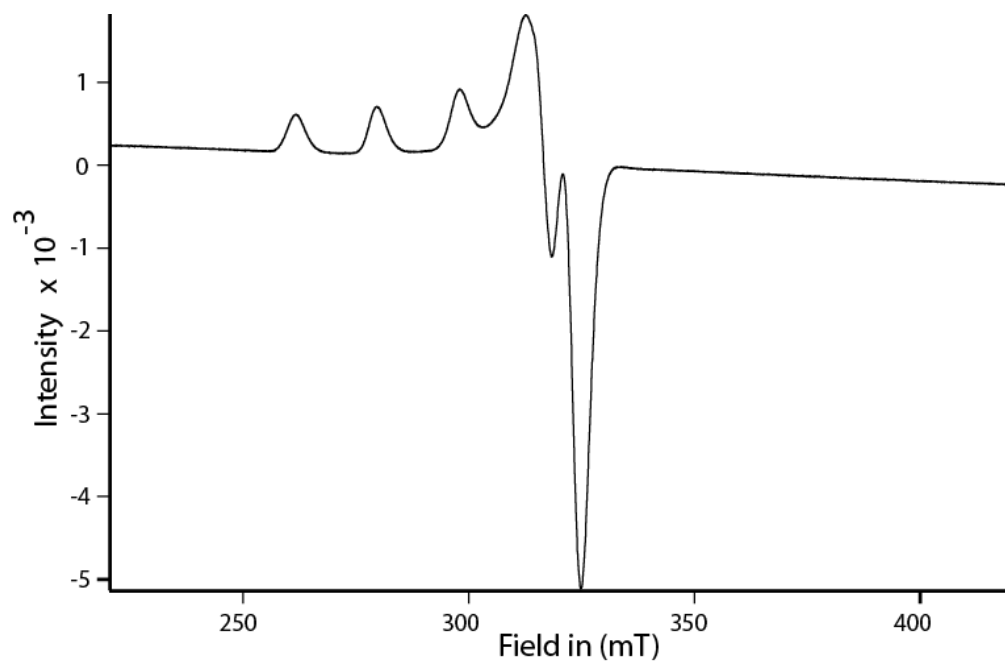

**Figure S5.** EPR of complex **2** [Cu(S-fTyr)<sub>2</sub>(Pyrazin)] in MeOH at 77k.

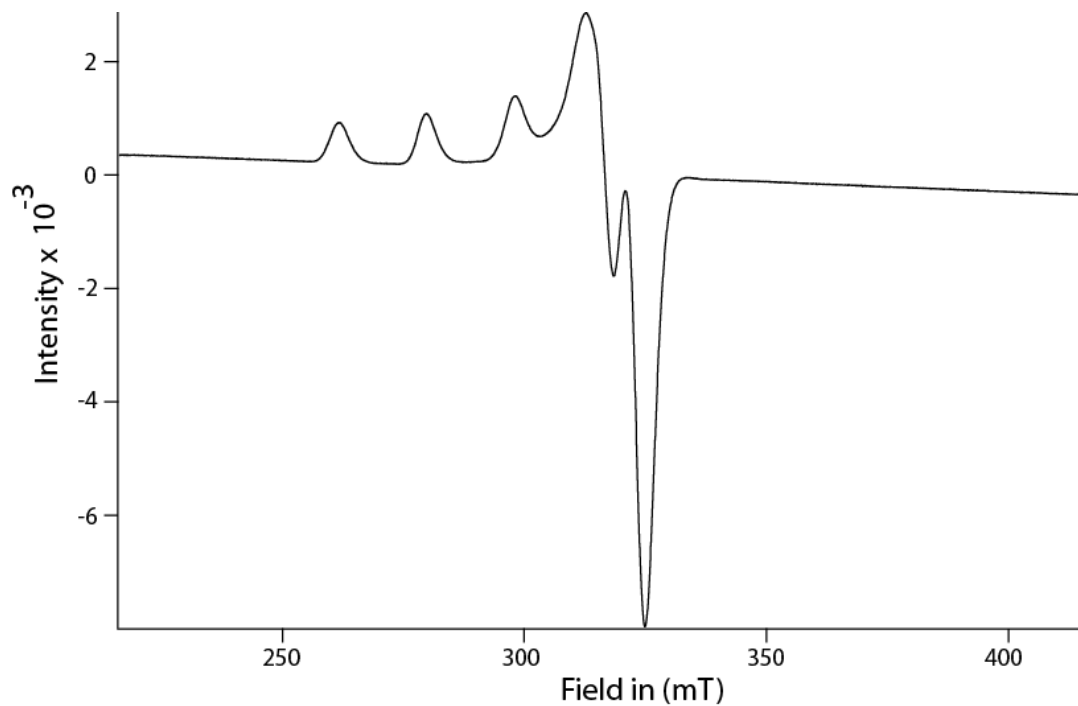

**Figure S6.** EPR of complex **3** [Cu(S-fTyr)<sub>2</sub>(Py)] in MeOH at 77k.

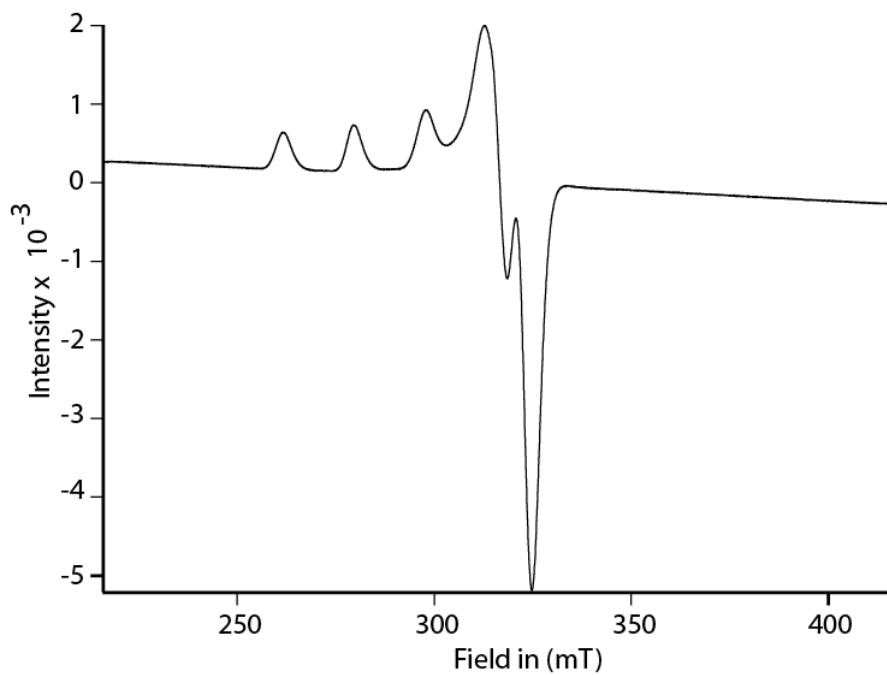

**Figure S7.** EPR of complex **4** [Cu(S-fTyr)<sub>2</sub>(bpy)] in MeOH at 77k.

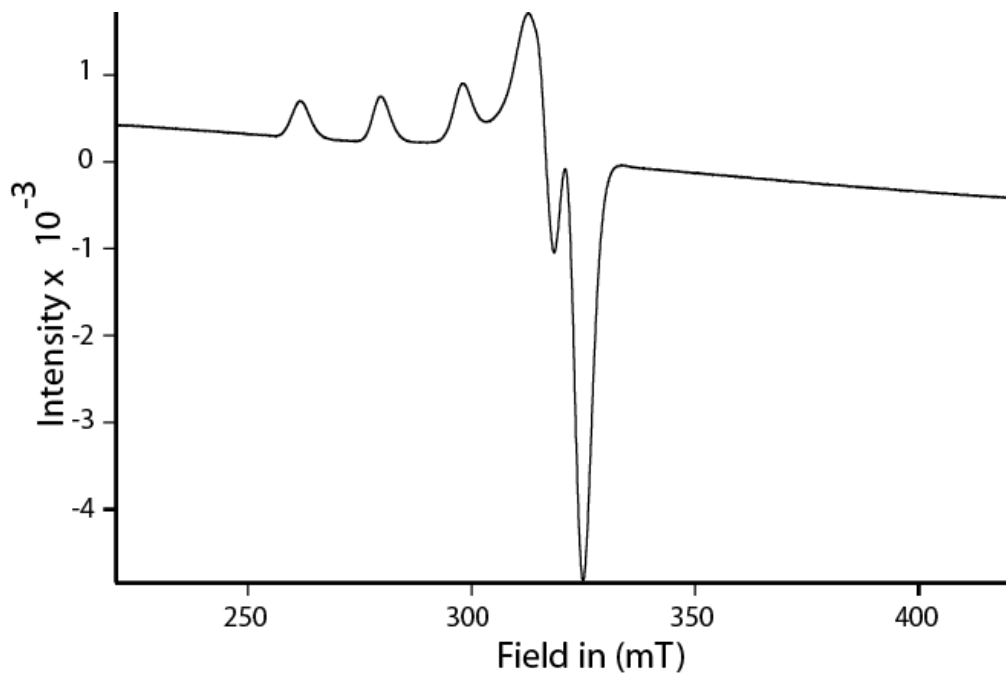

**Figure S8.** EPR of complex **5** [Cu(*S*-fTyr)<sub>2</sub>(H<sub>2</sub>O)]. in MeOH at 77k.
